# Supplementary material
Source: publisher site journal article supplement (https://www.spandidos-publications.com/6869/downloadSupplementary)

Figure S1. (A) Hematoxylin and eosin staining showing that tumor cells invaded the entire bladder layer (the black double arrows highlight the entire bladder layer). (B) The right seminal vesicle is not invaded (black arrow, smooth muscle layer; red arrow, seminal vesicle). (C) The left seminal vesicle is not invaded (black arrow, smooth muscle layer; red arrow, seminal vesicle). (D) Tissue surrounding the upper bladder resection margin is not invaded (black arrow shows fibroadipose tissue). (E) The right iliac fossa and obturator lymph nodes are not invaded (black arrow shows lymphoid follicles). (F) The left iliac fossa and obturator lymph nodes are not invaded (black arrow shows lymphoid follicles). (G) The junction of the prostate and bladder is not invaded (black arrow, smooth muscle layer; red arrow, prostate gland). (H) The right vas deferens is not invaded (black arrow, smooth muscle layer; red arrow, vas deferens). (I) The left vas deferens is not invaded (black arrow, smooth muscle layer; red arrow, vas deferens). (J) The prostate gland is not invaded (red arrow shows the prostate gland). (K) The right ureter is not invaded (black arrow, smooth muscle layer; red arrow, submucosal layer; yellow arrow, urothelial layer). (L) The left ureter is not invaded (black arrow, smooth muscle layer; red arrow, submucosal layer; yellow arrow, urothelial layer). Magnification, x40.

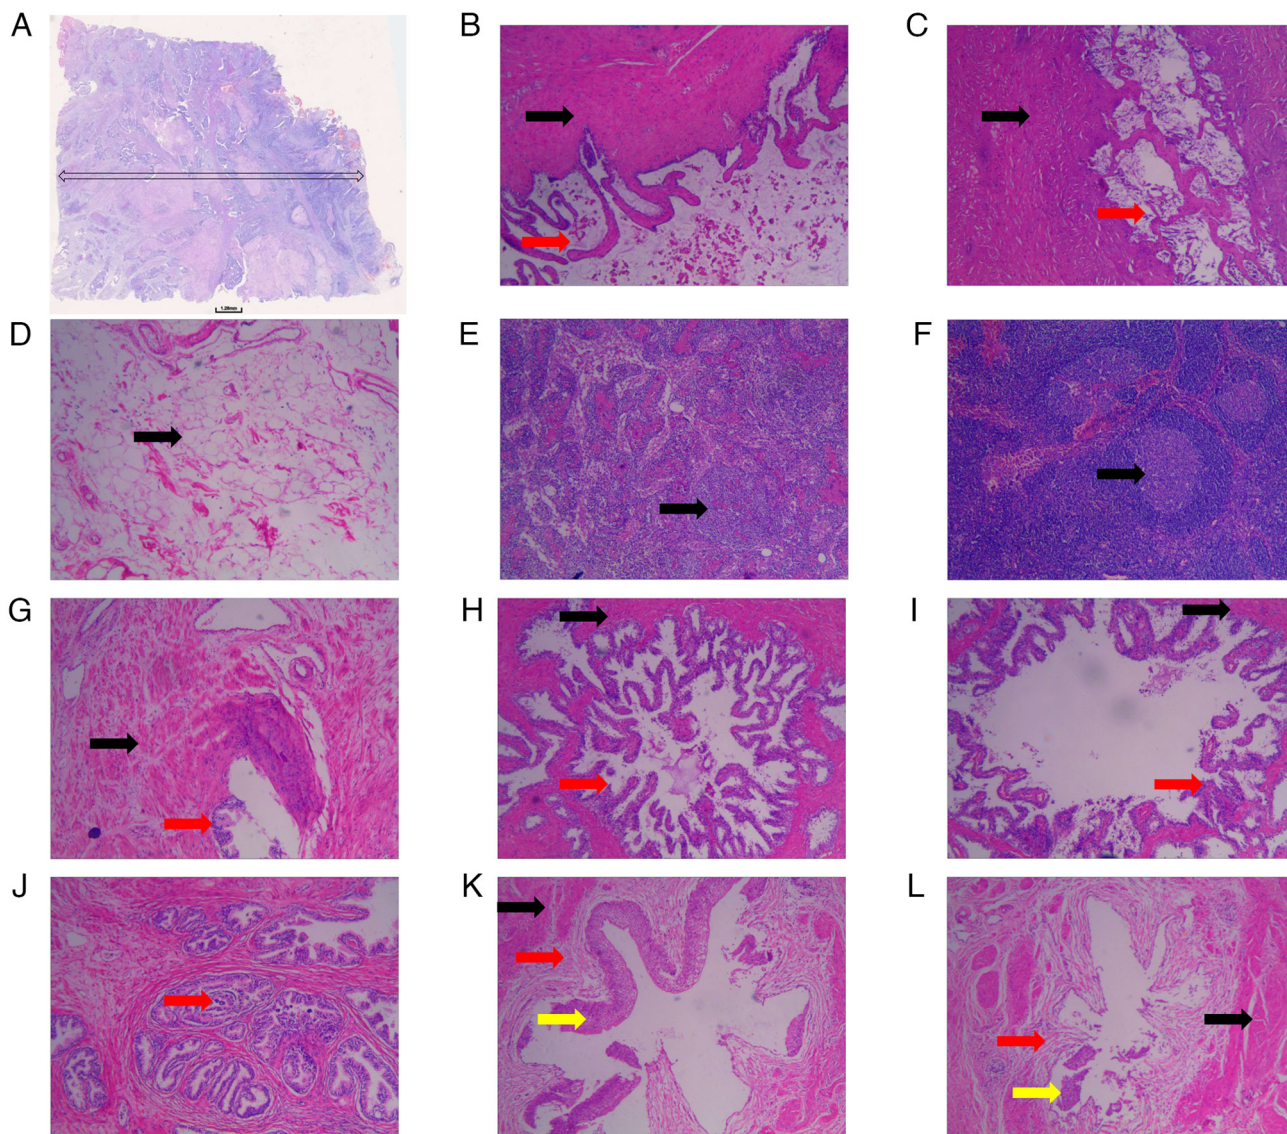

Supplement: Supplementary file 1 [file downloadSupplementary]
